# Supplementary material
Source: PubMed Central journal article supplement (PMC10213149)
Supplement: NIHMS1887731-supplement-321833_Major_Resources_Table.pdf [file NIHMS1887731-supplement-321833_Major_Resources_Table.pdf]

## Major Resources Table

In order to allow validation and replication of experiments, all essential research materials listed in the Methods should be included in the Major Resources Table below. Authors are encouraged to use public repositories for protocols, data, code, and other materials and provide persistent identifiers and/or links to repositories when available. Authors may add or delete rows as needed.

### Animals (in vivo studies)

| Species | Vendor or Source | Background Strain | Sex | Persistent ID / URL |
|---------|------------------|-------------------|-----|---------------------|
|         |                  |                   |     |                     |
|         |                  |                   |     |                     |
|         |                  |                   |     |                     |

### Genetically Modified Animals

|                 | Species | Vendor or Source          | Background Strain        | Other Information                                                                                | Persistent ID / URL |
|-----------------|---------|---------------------------|--------------------------|--------------------------------------------------------------------------------------------------|---------------------|
| Parent - Male   | Mouse   | TJU-WUSTL<br>(GW Dorn II) | Mixed C57Bl/6J,<br>FVB/N | <sup>Tg/Tg</sup> (Myh6/-tetO-linker) x<br><sup>Tg/Tg</sup> (Myh6/tTA) x<br>Mfn2 <sup>fl/fl</sup> |                     |
| Parent - Female |         |                           |                          | See text.                                                                                        |                     |

### Antibodies

| Target antigen                      | Vendor or Source            | Catalog # | Working concentration | Lot #<br>(preferred but not required) | Persistent ID / URL/RRID |
|-------------------------------------|-----------------------------|-----------|-----------------------|---------------------------------------|--------------------------|
| Anti-MCU                            | Cell signaling              | D2Z3B     | 1:500 WB, 1:100 IF    |                                       | RRID:AB_2721812          |
| Anti-RFP                            | Life Technologies           | R10367    | 1:100 IG              | 1425235                               | RRID:AB_10563941         |
| Anti-RyR2                           | Invitrogen                  | MA3-916   | 1:500 WB, 1:50 IF     |                                       | RRID:AB_2183054          |
| Alexa fluor 488 chicken anti rabbit | Invitrogen                  | A21441    | 1:200                 |                                       | RRID:AB_2535859          |
| Alexa fluor 647 donkey anti mouse   | Invitrogen                  | A31571    | 1:200                 |                                       | RRID:AB_162542           |
| Calreticulin                        | Cell Signaling Technologies | 2891      | WB 1:1000             |                                       | RRID:AB_2275208          |
| Calsequestrin                       | Abcam                       | ab3516    | WB 1:1000             |                                       | RRID:AB_303865           |
| Fluoronanogold Alexa Fluor 488      | Nanoprobes                  | 7202      | 1:200                 |                                       |                          |
| LiCor IRDye 680RD anti-mouse        | Li-Cor                      | 926-68022 | 1:10000               |                                       | RRID:AB_10715072         |
| LiCor IRDye 800CW anti-rabbit       | Li-Cor                      | 926-32213 | 1:5000                |                                       | RRID:AB_621848           |
| PGC1 $\alpha$                       | Abcam                       | ab72230   | WB 1:1000             |                                       | RRID:AB_1640773          |
| SERCA                               | Thermo Fisher Scientific    | MA3-919   | WB 1:1000             |                                       | RRID:AB_325502           |

**Chemicals, Peptides, and Recombinant proteins**

| <b>Name</b>                                 | <b>Vendor or Source</b>      | <b>Catalog #</b> | <b>Lot #</b> | <b>Persistent ID/URL/RRID</b>                                                                                           |
|---------------------------------------------|------------------------------|------------------|--------------|-------------------------------------------------------------------------------------------------------------------------|
| Acetone                                     | Electron microscopy Sciences | 10000            |              | <a href="https://pubchem.ncbi.nlm.nih.gov/compound/180">https://pubchem.ncbi.nlm.nih.gov/compound/180</a>               |
| 2, 3- butanedione monoxime                  | Sigma-Aldrich                | B0753-25g        |              | <a href="https://pubchem.ncbi.nlm.nih.gov/substance/329827967">https://pubchem.ncbi.nlm.nih.gov/substance/329827967</a> |
| Antimycin A                                 | Sigma-Aldrich                | A8674            |              | <a href="https://pubchem.ncbi.nlm.nih.gov/substance/24891355">https://pubchem.ncbi.nlm.nih.gov/substance/24891355</a>   |
| Bovine Serum Albumin Fraction V, heat shock | Sigma-Aldrich                | 03116964001      |              |                                                                                                                         |
| Calcium chloride solution                   | Sigma-Aldrich                | 21115            |              | <a href="https://pubchem.ncbi.nlm.nih.gov/substance/57647902">https://pubchem.ncbi.nlm.nih.gov/substance/57647902</a>   |
| Caffeine                                    | Sigma-Aldrich                | C0750–500 g      |              | <a href="https://pubchem.ncbi.nlm.nih.gov/substance/24277682">https://pubchem.ncbi.nlm.nih.gov/substance/24277682</a>   |
| Calf serum                                  | Cytiva                       | SH30073          |              |                                                                                                                         |
| Collagenase type 2                          | Worthington-Biochem          | LS004176         |              |                                                                                                                         |
| Creatine                                    | Sigma-Aldrich                | C0780-50g        |              | <a href="https://pubchem.ncbi.nlm.nih.gov/substance/24892273">https://pubchem.ncbi.nlm.nih.gov/substance/24892273</a>   |
| Cyclosporin A                               | Santa Cruz Biotechnologies   | sc-3503          |              |                                                                                                                         |
| Dulbecco's modified eagle's medium          | Sigma-Aldrich                | D5030-10L        |              |                                                                                                                         |
| Durcupan, ACM, Epoxy resin kit              | Electron microscopy Sciences | RT14040          |              |                                                                                                                         |
| EPON, Embed 812 Embedding kit               | Electron microscopy Sciences | 14900            |              |                                                                                                                         |
| Ethanol, 200 proof                          | Decon laboratories, Inc      | 2701             |              |                                                                                                                         |
| FCCP                                        |                              |                  |              |                                                                                                                         |
| Formvar Solution in Ethylene Dichloride     | Electron Microscopy Sciences | 15810            |              |                                                                                                                         |
| Fura-IoAff K+ salt                          | Teflabs                      | 0137             |              |                                                                                                                         |
| GoldEnhance EM Plus                         | nanoprobes                   | 2114             |              |                                                                                                                         |
| Glucose (dextrose)                          | Sigma-Aldrich                | D9434-250g       |              | <a href="https://pubchem.ncbi.nlm.nih.gov/substance/24894295">https://pubchem.ncbi.nlm.nih.gov/substance/24894295</a>   |
| Glutaraldehyde, 25% solution                | Electron Microscopy Sciences | 16210            |              |                                                                                                                         |
| HALT Protease & Phosphatase Inhibitor       | ThermoFisher Scientific      | 78440            |              |                                                                                                                         |
| HEPES, powder                               | Fisher Bioreagents           | BP310-1          |              |                                                                                                                         |

DOI [to be added]

|                                                  |                              |                  |  |                                                                                                                       |
|--------------------------------------------------|------------------------------|------------------|--|-----------------------------------------------------------------------------------------------------------------------|
| HEPES, buffer solution                           | Gibco                        | 15630-080        |  |                                                                                                                       |
| Heparin, 1000 usp units per ml                   | Sagent Pharmaceuticals       | NDC 25021-400-01 |  |                                                                                                                       |
| Isoproterenol hydrochloride                      | Sigma-Aldrich                | I6504-1g         |  | <a href="https://pubchem.ncbi.nlm.nih.gov/substance/24278495">https://pubchem.ncbi.nlm.nih.gov/substance/24278495</a> |
| ITS (insulin-transferrin-selenium)               | Sigma-Aldrich                | I-1884           |  |                                                                                                                       |
| Krebs-Henseleit buffer modified                  | Sigma-Aldrich                | K3753-10X1L      |  |                                                                                                                       |
| Laminin                                          | Corning                      | 354232           |  |                                                                                                                       |
| L-glutamine                                      | Gibco                        | 25030-081        |  |                                                                                                                       |
| Lead nitrate                                     | Sigma Aldrich                | 467790-50G       |  | <a href="https://pubchem.ncbi.nlm.nih.gov/substance/24870438">https://pubchem.ncbi.nlm.nih.gov/substance/24870438</a> |
| Li-Cor Blocking Buffer                           | Li-Cor                       | 927-50000        |  |                                                                                                                       |
|                                                  |                              |                  |  |                                                                                                                       |
| Luna® Universal One-Step Reaction buffer         | New England Biolabs          | E3005            |  |                                                                                                                       |
| Magnesium chloride                               | Sigma-Aldrich                | M8266-100g       |  | <a href="https://pubchem.ncbi.nlm.nih.gov/substance/24897235">https://pubchem.ncbi.nlm.nih.gov/substance/24897235</a> |
| Magnesium sulfate heptahydrate                   | Sigma-Aldrich                | M2773-500g       |  | <a href="https://pubchem.ncbi.nlm.nih.gov/substance/24896765">https://pubchem.ncbi.nlm.nih.gov/substance/24896765</a> |
| Mannitol                                         | Thermo Fisher Scientific     | M120-3           |  |                                                                                                                       |
| Methyl Alcohol                                   | Electron Microscopy Sciences | 18510            |  |                                                                                                                       |
| MEM + glutamax                                   | Gibco                        | 41090-036        |  |                                                                                                                       |
| MitoTracker Red CMXros                           | Invitrogen                   | M7512            |  |                                                                                                                       |
| Monarch Total RNA miniprep kit                   | New England Biolabs          | T2010            |  |                                                                                                                       |
| Oligomycin from streptomyces diastatochromogenes | Sigma-Aldrich                | O4876-25mg       |  | <a href="https://pubchem.ncbi.nlm.nih.gov/substance/24898006">https://pubchem.ncbi.nlm.nih.gov/substance/24898006</a> |
| Osmium tetroxide, 4%                             | Electron Microscopy Sciences | RT19150          |  |                                                                                                                       |
| Paraformaldehyde, 32%                            | Electron Microscopy Sciences | 15714-S          |  |                                                                                                                       |
| PBS, pH 7.4 (1X)                                 | Gibco                        | 10010-023        |  |                                                                                                                       |
| Penicilin/streptomycin                           | Gibco                        | 15140-122        |  |                                                                                                                       |
| Percoll                                          | Sigma-Aldrich                | P1644-100ml      |  |                                                                                                                       |
| Pluronic® F127                                   | Sigma-Aldrich                | P-2443           |  |                                                                                                                       |

|                                                 |                              |            |  |                                                                                                                         |
|-------------------------------------------------|------------------------------|------------|--|-------------------------------------------------------------------------------------------------------------------------|
| Potassium chloride                              | Sigma-Aldrich                | P9541-500g |  | <a href="https://pubchem.ncbi.nlm.nih.gov/substance/24899042">https://pubchem.ncbi.nlm.nih.gov/substance/24899042</a>   |
| Potassium hexacyanoferrate(II) -13C6 trihydrate | Sigma-Aldrich                | 736716     |  | <a href="https://pubchem.ncbi.nlm.nih.gov/substance/329765135">https://pubchem.ncbi.nlm.nih.gov/substance/329765135</a> |
| Potassium phosphate monobasic                   | Sigma-Aldrich                | P9791-100g |  | <a href="https://pubchem.ncbi.nlm.nih.gov/substance/24898921">https://pubchem.ncbi.nlm.nih.gov/substance/24898921</a>   |
| Proteinase K                                    | Thermo Fisher Scientific     | 25530049   |  |                                                                                                                         |
| Resolving buffer                                | Biorad                       | 161-0798   |  |                                                                                                                         |
| RNA-Later solution                              | Thermo Fisher Scientific     | AM7921     |  |                                                                                                                         |
| Rotenone                                        |                              |            |  |                                                                                                                         |
| Seahorse XFe24 FluxPak                          | Agilent Technologies         | 102340-100 |  |                                                                                                                         |
| SlowFade Gold Antifade Mountant                 | Thermo Fisher Scientific     | S36937     |  |                                                                                                                         |
| Sodium aspartate                                |                              |            |  |                                                                                                                         |
| Sodium bicarbonate                              | Sigma-Aldrich                | S5761-500g |  | <a href="https://pubchem.ncbi.nlm.nih.gov/substance/24899673">https://pubchem.ncbi.nlm.nih.gov/substance/24899673</a>   |
| Sodium chloride                                 | Sigma-Aldrich                | S5886-500g |  | <a href="https://pubchem.ncbi.nlm.nih.gov/substance/24899675">https://pubchem.ncbi.nlm.nih.gov/substance/24899675</a>   |
| Sodium cyanide                                  | Sigma-Aldrich                | S3296      |  | Product has been discontinued.                                                                                          |
| Sodium Cacodylate Buffer                        | Electron Microscopy Sciences | 11652      |  |                                                                                                                         |
| Sodium phosphate dibasic                        | Sigma-Aldrich                | S5136-100g |  | <a href="https://pubchem.ncbi.nlm.nih.gov/substance/24899638">https://pubchem.ncbi.nlm.nih.gov/substance/24899638</a>   |
| Sodium pyruvate                                 | Sigma-Aldrich                | P8574-25g  |  | <a href="https://pubchem.ncbi.nlm.nih.gov/substance/24898951">https://pubchem.ncbi.nlm.nih.gov/substance/24898951</a>   |
| Spurr's resin                                   | Electron Microscopy Sciences | RT14300    |  |                                                                                                                         |
| Stacking buffer                                 | Biorad                       | 161-0799   |  |                                                                                                                         |
| Tail Lysis Buffer1                              | BioWorld                     | 10450042   |  |                                                                                                                         |
| Tannic Acid                                     | Electron Microscopy Sciences | 21700      |  |                                                                                                                         |
| Taurine                                         | Sigma-Aldrich                | T0625-100g |  | <a href="https://pubchem.ncbi.nlm.nih.gov/substance/24278721">https://pubchem.ncbi.nlm.nih.gov/substance/24278721</a>   |
| Thiocarbohydrazide                              | Electron Microscopy Sciences | RT21900    |  |                                                                                                                         |
| Triphenyl tetrazolium chloride                  | Hach Company                 | 2406042    |  |                                                                                                                         |
| Triton X-100                                    | Calbiochem                   | 648462     |  |                                                                                                                         |
| Uranyl Acetate                                  | Electron Microscopy Sciences | 22400      |  |                                                                                                                         |
|                                                 |                              | E3005      |  |                                                                                                                         |

|                            |                        |  |  |  |
|----------------------------|------------------------|--|--|--|
| WarmStart RT<br>Enzyme mix | New England<br>Biolabs |  |  |  |
|----------------------------|------------------------|--|--|--|

**DNA/cDNA Clones**

| Clone Name | Sequence | Source / Repository | Persistent ID / URL |
|------------|----------|---------------------|---------------------|
|            |          |                     |                     |
|            |          |                     |                     |
|            |          |                     |                     |

**Cultured Cells**

| Name | Vendor or Source | Sex (F, M, or unknown) | Persistent ID / URL |
|------|------------------|------------------------|---------------------|
|      |                  |                        |                     |
|      |                  |                        |                     |
|      |                  |                        |                     |

**Data & Code Availability**

| Description | Source / Repository | Persistent ID / URL |
|-------------|---------------------|---------------------|
|             |                     |                     |
|             |                     |                     |
|             |                     |                     |

**Other**

| Description                                       | Source / Repository                               | Persistent ID / URL |
|---------------------------------------------------|---------------------------------------------------|---------------------|
| Doxy-diet Modified 5001 diet w/200ppm doxycycline | Animal Specialties and Provisions, Quakertown, PA |                     |
|                                                   |                                                   |                     |
|                                                   |                                                   |                     |

## ARRIVE GUIDELINES

The ARRIVE guidelines (<https://arriveguidelines.org/>) are a checklist of recommendations to improve the reporting of research involving animals. Key elements of the study design should be included below to better enable readers to scrutinize the research adequately, evaluate its methodological rigor, and reproduce the methods or findings.

**Study Design –for In vivo cardiac function (Echocardiography) experiments shown in Fig.2,S2 for basal recordings Basal includes the the animals assigned for Isoproterenol (iso) challenge as well, for their basal values before Iso injection. For other, smaller-scale survival and non-survival experiments, see Table S2.**

| Groups                | Sex | Age      | Number (prior to experiment)         | Number (after termination)         | Littermates (Yes/No) | Other description                               |
|-----------------------|-----|----------|--------------------------------------|------------------------------------|----------------------|-------------------------------------------------|
| Group 1 (Control)     | F   | 12-18 wk | 23 (basal-Fig3)<br>13 (iso-Figs7,S5) | 23 (basal-Fig3)<br>10 (iso-Fg7,S5) | No/partial           | 3 Iso-injected females died before termination  |
| Group 2 (Control)     | M   | 12-18 wk | 22 (basal-Fig3)<br>10 (iso-Figs7,S5) | 22 (basal-Fig3)<br>10 (iso-Fg7,S5) | No/partial           |                                                 |
| Group 3 (Linker)      | F   | 12-18 wk | 21 (basal-Fig3)<br>11 (iso-Figs7,S5) | 21 (basal-Fig3)<br>10 (iso-Fg7,S5) | No/partial           | 1 Iso-injected female died before termination   |
| Group 4 (Linker)      | M   | 12-18 wk | 32 (basal-Fig3)<br>15 (iso-Figs7,S5) | 32 (basal-Fig3)<br>13 (iso-Fg7,S5) | No/partial           | 2 Iso-injected males died before termination    |
| Group 5 (Doxy-Linker) | F   | 12-18 wk | 6 (basal-Fig3)<br>6 (iso-Figs7,S5)   | 6 (basal-Fig3)<br>4 (iso-Fg7,S5)   | No/partial           | 2 Iso- injected females died before termination |
| Group 6 (Doxy-Linker) | M   | 12-18 wk | 5 (basal-Fig3)<br>5 (iso-Figs7,S5)   | 5 (basal-Fig3)<br>5 (iso-Fg7,S5)   | No/partial           |                                                 |

**Sample Size:** Please explain how the sample size was decided Please provide details of any a *prior* sample size calculation, if done. Since both genders were used, for each group minimum 5-6 animals from each sex were the original target for the injurious stress (isoproterenol injection) experiments, with the notion that the experiments are exploratory and significant findings will require further studies. For the first experiment, only Control and Linker groups were compared. This was followed by a second round of study/experiments, where Control, Linker and Doxy-linker groups were compared. This effectively doubled N for the Control and Linker groups. Basal Echo recordings were also obtained from other smaller cohorts that were then assigned to other in vivo survival assays (e.g. blood pressure measurement, treadmill exercise performance); that is why N for basal are higher.

### Inclusion Criteria

Besides the genotype, mouse inclusion was primarily based on age range. The assigned animals should have stayed visibly healthy and non-distressed until the start of the experimental use.

### Exclusion Criteria

Animals displaying distress or appearing sick before the experimental use were excluded. When echocardiography was performed with heart rate recording, animals with <400/min basal heart rate were excluded from the analysis (concern of relative isoflurane overdose).

### Randomization

Whenever more than one pair of Ctr vs Lnk (vs Doxy-Lnk) animals were used for in vivo experiments (e.g. echocardiography), attention was paid to perform the procedure on the animals by alternating between groups to avoid potential biased variations in the individual waiting time in the cages at the performance site. When males and females were both used, the alternation between groups was done in male-male, female-female pairs.

### Blinding

DOI [to be added]

The person, who did the imaging, performed the primary Echocardiography analysis. He was provided with the animal (ear tag) ID number without the group information and the IDs were 'decoded'/un-blinded during the secondary comparative analyses.
