# Supplementary material
Source: PubMed Central journal article supplement (PMC10213149)

Full Unedited Gels for Figure 1D

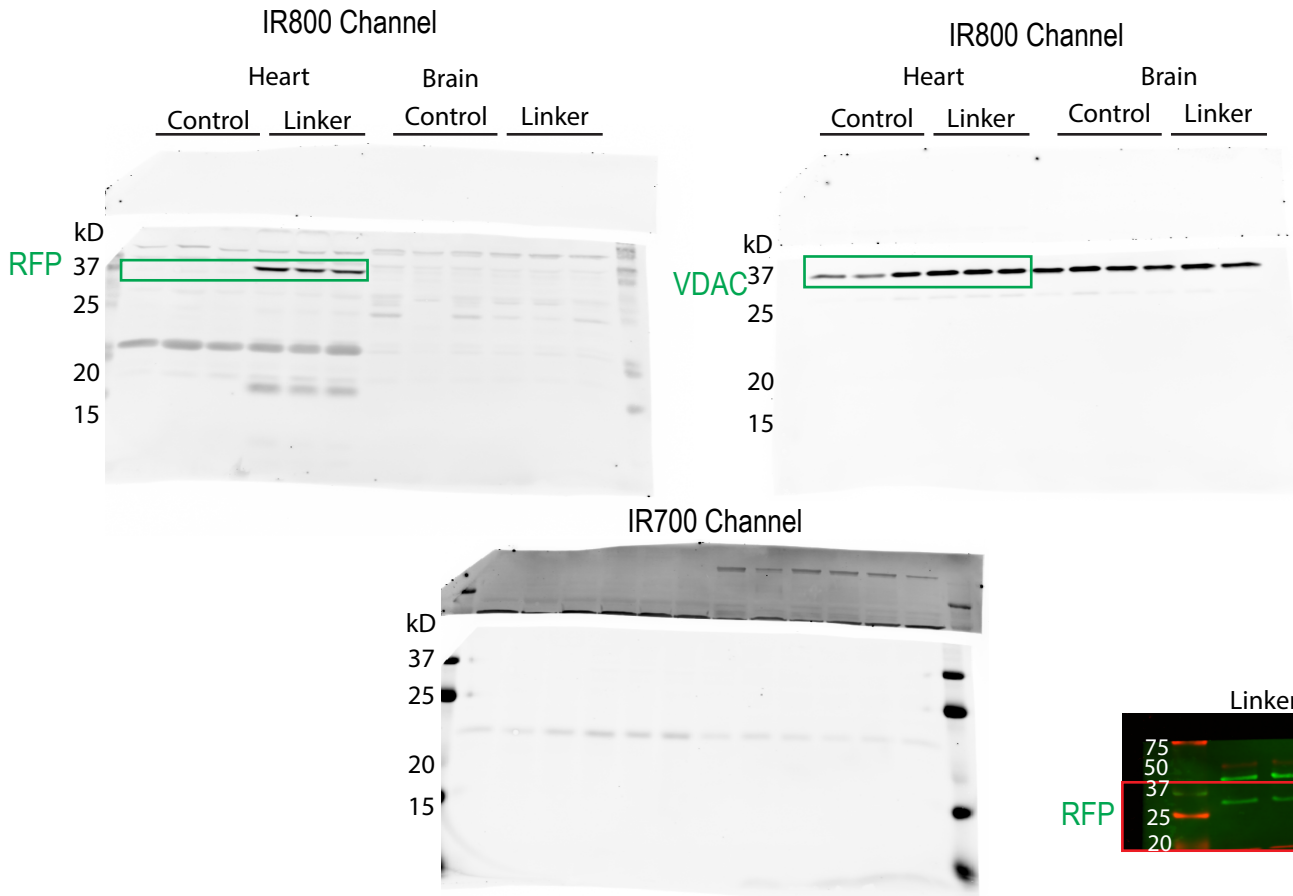

Full Unedited Gels for Figure 3C

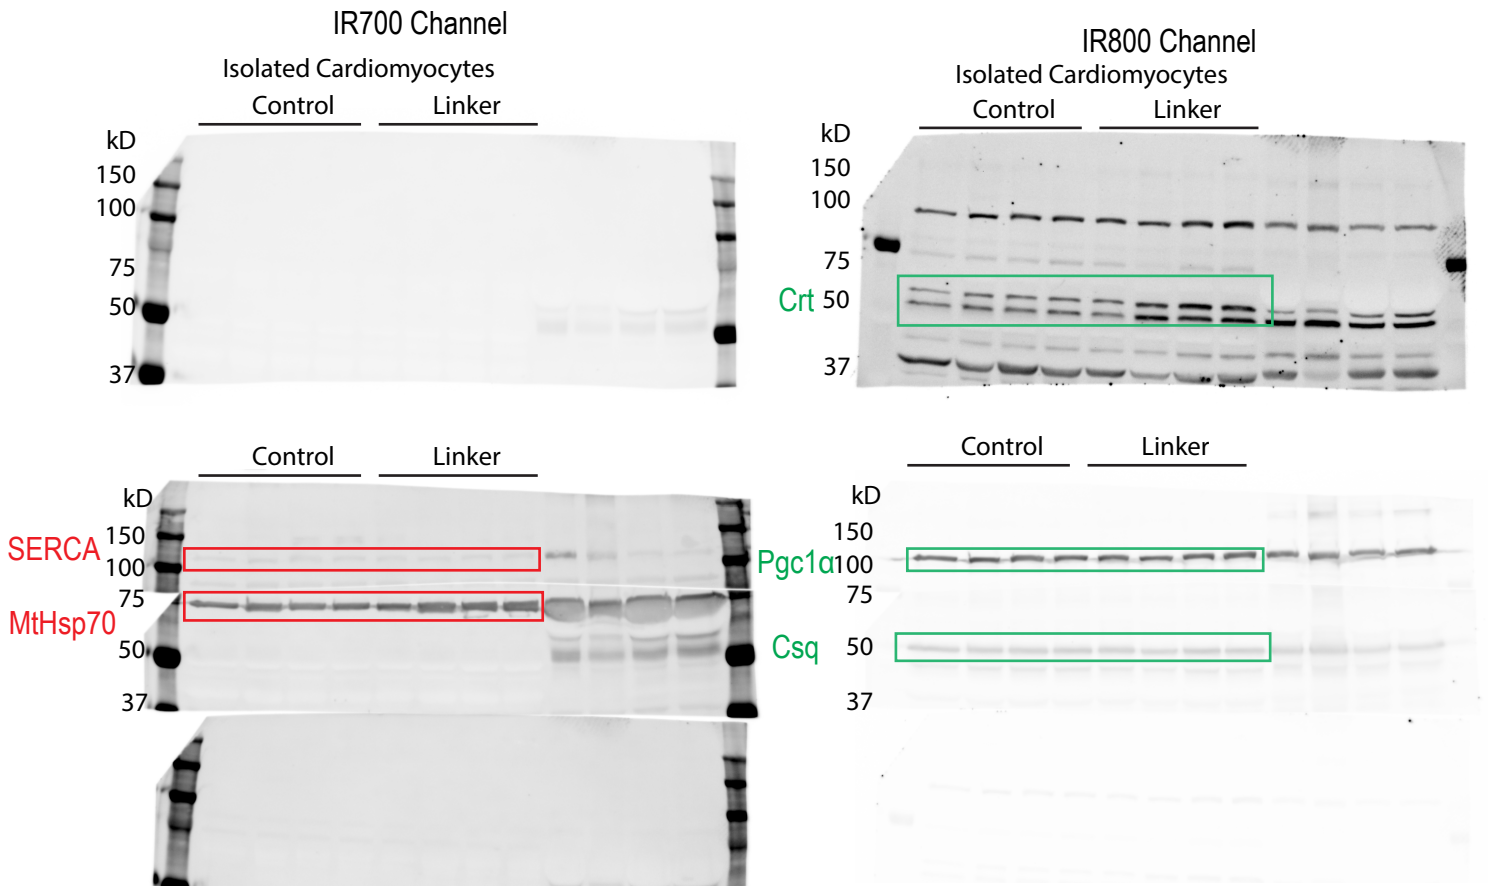

Full Unedited Gels for Figure S3C

Epi Blue (total Protein)

Shown in the figure

IR700 Channel

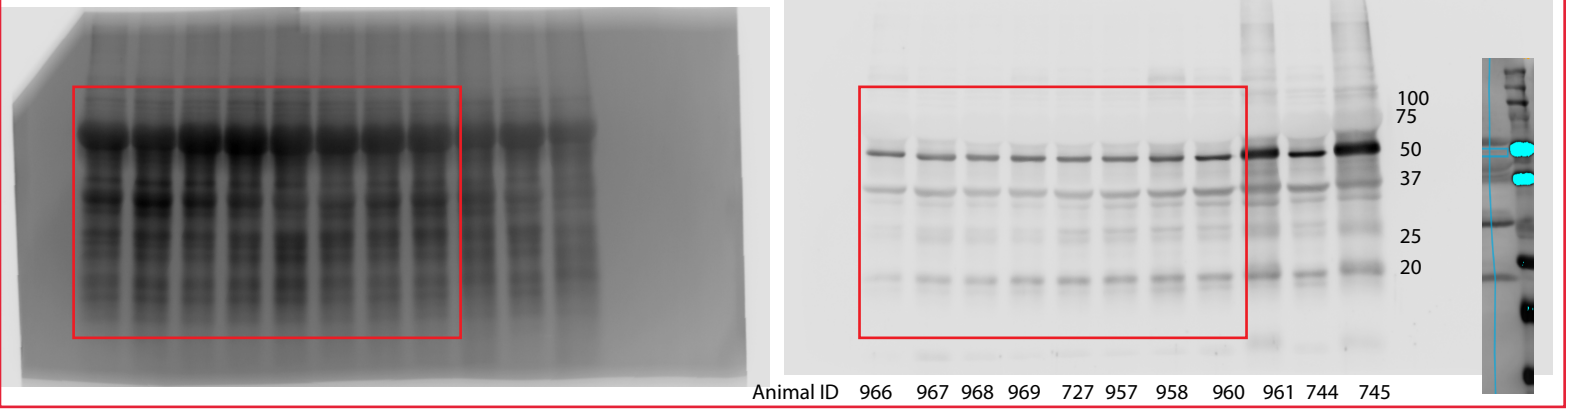

Not shown in the figure (used for analysis)

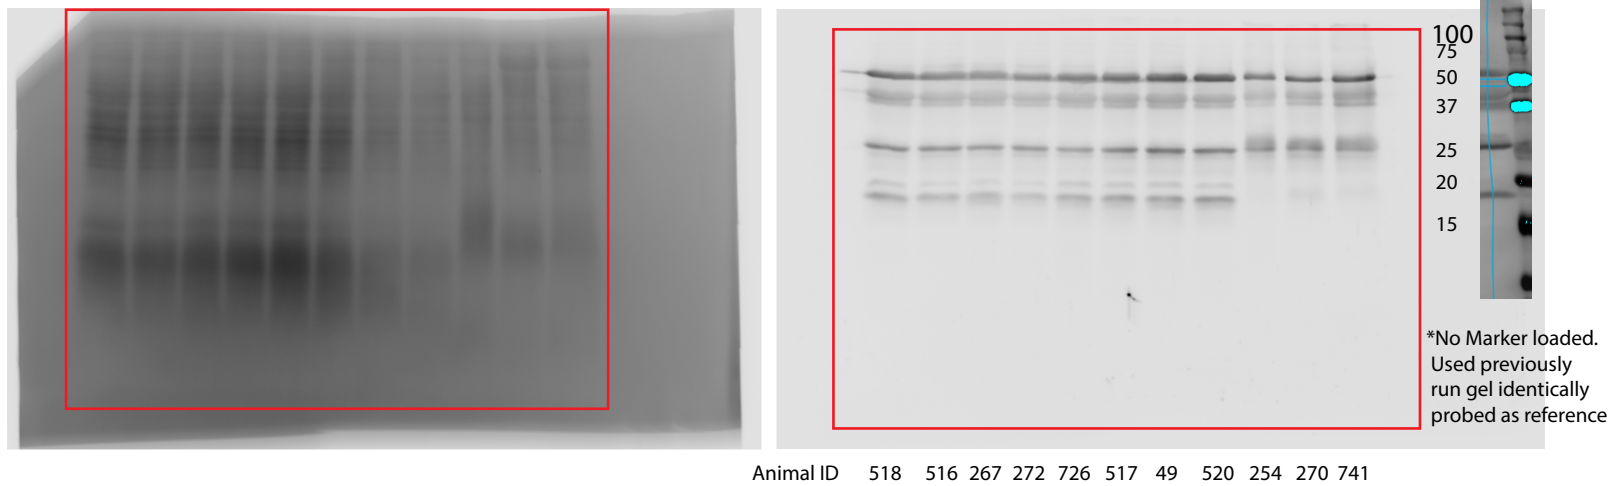

Not shown in the figure (used for analysis)

Ponceau (total Protein)

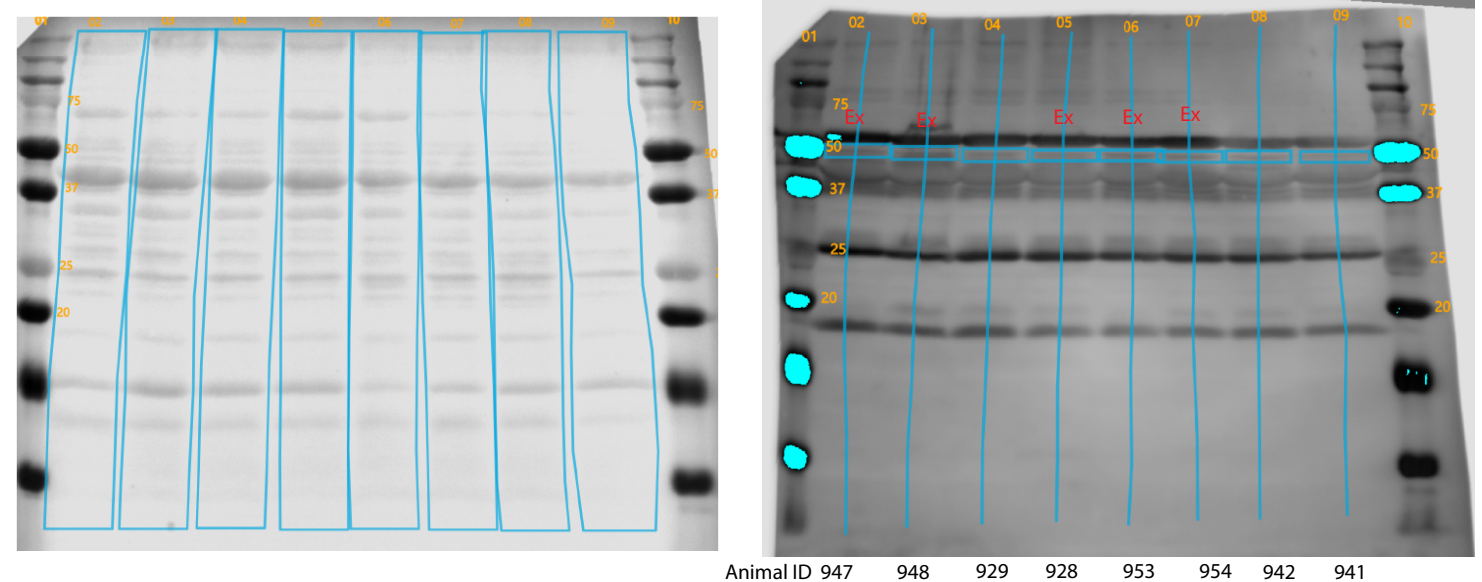

CxIII Analysis: Samples Excluded due to interference from adjacent bands

Full Unedited Gels for Figure S3D

Epi Blue (Total Protein)

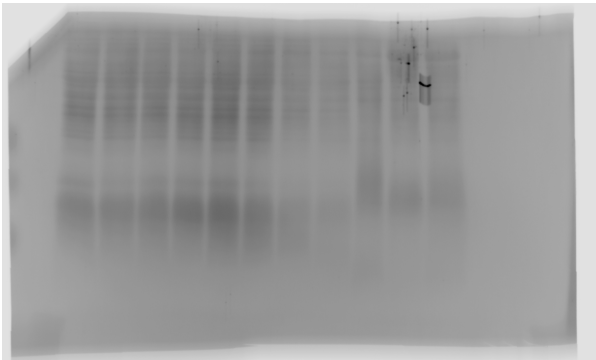

IR800 Channel

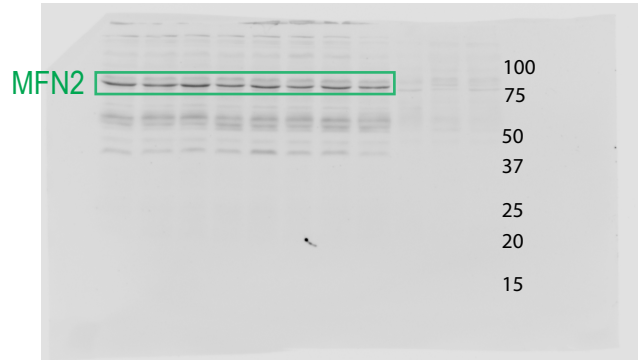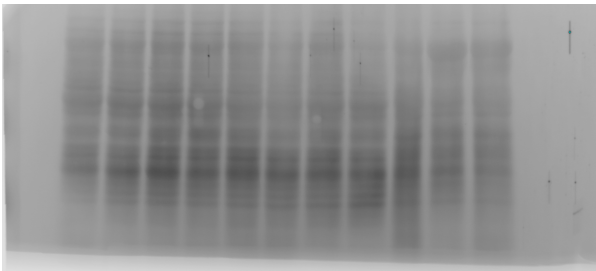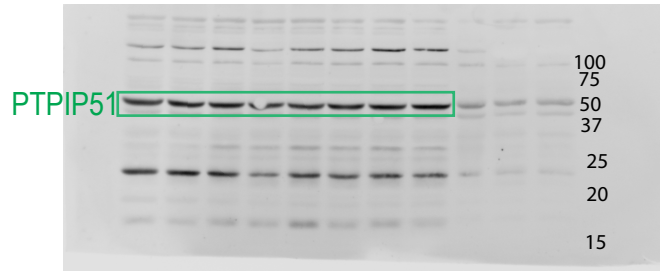

Supplement: NIHMS1887731-supplement-321833_Uncut_Gel_Blots.pdf [file NIHMS1887731-supplement-321833_Uncut_Gel_Blots.pdf]
